# Supplementary material for: The Florey Adelaide Male Ageing Study (FAMAS): Design, procedures & participants
Source: PubMed Central journal article supplement (PMC1925076; doi:10.1186/1471-2458-7-126), 2007-06-27
Supplement: 1471-2458-7-126-S1.pdf [file 1471-2458-7-126-S1.pdf]

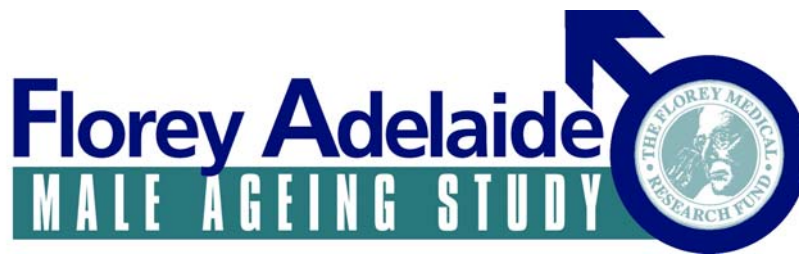

## Health Service Utilisation Questions

1. **Have you visited a G.P (General Practitioner) in the last twelve months? (please tick box)**

a)  No, go to question 2

b)  Yes (see below)

If yes, please indicate how many times you visited your G.P. (tick box)

1-2 Times

3-4 Times

5-9 Times

10+ Times

i) What was the main reason for your last visit to your G.P. (please tick one):

Health Crisis/Sickness

Health Advice

Medication

Regular Check-Up

Screening (e.g. prostate check)

Immunisation

Family (e.g. children)

Other (please specify).....

ii) Overall, how would you rate your last visit to the G.P. (please tick box)

Excellent

Very Good

Good

Fair

Poor

iii) Were any other health concerns addressed by your doctor, other than your main health concern? (please tick box)

a)  No, go to question 2

b)  Unsure, go to question 2

c)  Yes. If yes, did you want this health concern to be addressed (please tick box)

- a.  Yes
- b.  No
- c.  Undecided

**2. Other Health Service Providers**

i) Please indicate how many times you have visited the following health service providers in the last twelve months (write number of visits in the box)

e.g.  Pharmacist (indicates 3 times in last twelve months)

- |                                                                                      |                                                    |
|--------------------------------------------------------------------------------------|----------------------------------------------------|
| <input type="checkbox"/> Physiotherapist                                             | <input type="checkbox"/> Occupational Therapist    |
| <input type="checkbox"/> Dietitian/Nutritionist                                      | <input type="checkbox"/> Dentist/Orthodontist      |
| <input type="checkbox"/> Podiatrist                                                  | <input type="checkbox"/> Pharmacist                |
| <input type="checkbox"/> Naturopath                                                  | <input type="checkbox"/> Chiropractor              |
| <input type="checkbox"/> Osteopath                                                   | <input type="checkbox"/> Fitness/ Personal Trainer |
| <input type="checkbox"/> Optometrist                                                 | <input type="checkbox"/> Audiologist               |
| <input type="checkbox"/> Nurse                                                       |                                                    |
| <input type="checkbox"/> Medical specialist (e.g. cardiologist), please specify..... |                                                    |
| <input type="checkbox"/> Other, please specify.....                                  |                                                    |

ii) Indicate the three most influential health service providers with respect to your health and wellbeing (please tick no more than 3)

- |                                                 |                                                    |
|-------------------------------------------------|----------------------------------------------------|
| <input type="checkbox"/> Physiotherapist        | <input type="checkbox"/> Occupational Therapist    |
| <input type="checkbox"/> Dietitian/Nutritionist | <input type="checkbox"/> Dentist/Orthodontist      |
| <input type="checkbox"/> Podiatrist             | <input type="checkbox"/> Pharmacist                |
| <input type="checkbox"/> Naturopath             | <input type="checkbox"/> Chiropractor              |
| <input type="checkbox"/> Osteopath              | <input type="checkbox"/> Fitness/ Personal Trainer |
| <input type="checkbox"/> Optometrist            | <input type="checkbox"/> Audiologist               |

Nurse

General Practitioner

Medical specialist (e.g. cardiologist), please specify.....

Other, please specify.....

iii) When seeking health advice, which of the settings below, do you find most welcoming? (tick no more than three)

Community Health Centre

Private Practice (e.g. Dr's rooms)

Hospital (in-patient, e.g. surgery)

Hospital (Dr's rooms)

Emergency/Casualty Department

Fitness Centre/Gym

Service provider's home

Your workplace

Chemist/Pharmacy

Your own home

Other, please specify .....

**3. Private Health Insurance**

i) Do you currently have private health insurance

a)  No

b)  Yes (see below)

ii) If yes, please indicate the level of cover (tick box)

Basic

Comprehensive (basic with Extras)

Extras only

Other, please specify .....

iii) What type of cover (tick box)

Individual

Other, please specify .....

Family
